# Supplementary material for: Surface coverage control for dramatic enhancement of thermal CO oxidation by precise potential tuning of metal supported catalysts
Source: Royal Society of Chemistry journal article supplement (doi:10.1039/d2sc03145k), 2022-01-01
Supplement: d2sc03145k1.pdf [file d2sc03145k1.pdf]

**Electronic Supplementary Information**

**Surface coverage control for dramatic enhancement of thermal CO  
oxidation by precise potential tuning of metal supported catalysts**

Xingyu Qi,<sup>a</sup> Tatsuya Shinagawa,<sup>a</sup> Xiaofei Lu,<sup>a</sup> Yuhki Yui,<sup>b</sup> Masaya Ibe<sup>b</sup> and Kazuhiro Takanabe<sup>\*a</sup>

<sup>a</sup> *Department of Chemical System Engineering, School of Engineering, The University of Tokyo, 7-3-1 Hongo, Bunkyo-ku, Tokyo, Japan.*

<sup>b</sup> *Advanced Material Engineering Division, Higashifuji Technical Center, Toyota Motor Corporation, 1200 Mishuku, Susono, Shizuoka, Japan.*

*Corresponding author: Prof. Kazuhiro Takanabe, Email: [takanabe@chemsys.t.u-tokyo.ac.jp](mailto:takanabe@chemsys.t.u-tokyo.ac.jp)*

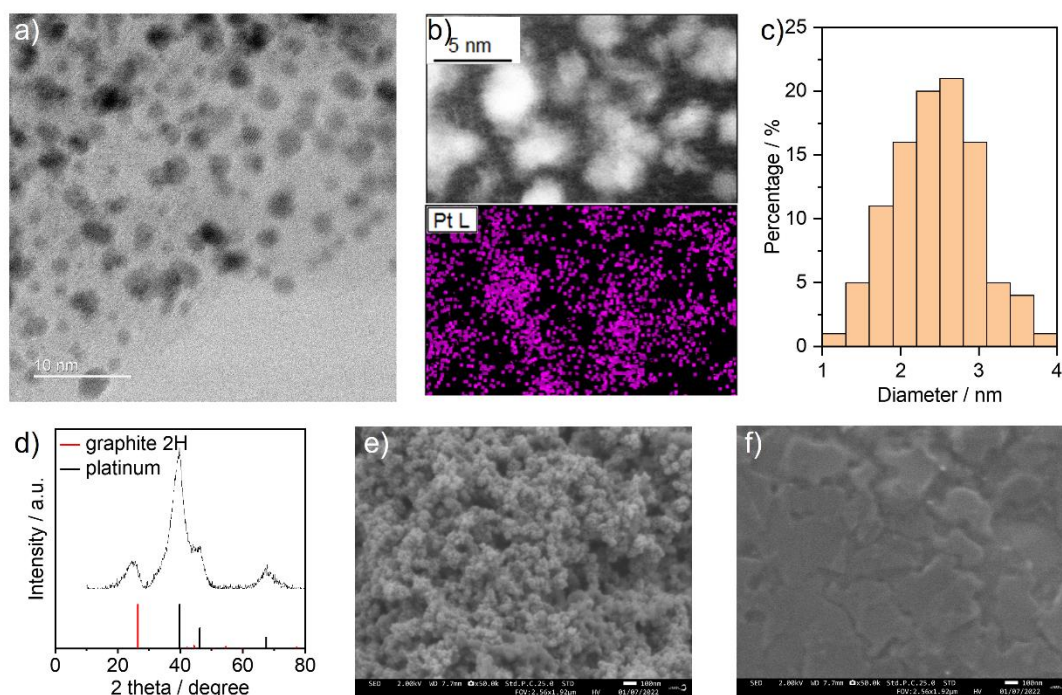

**Fig. S1.** **a)** TEM image, **b)** EDX-mapping image, **c)** distribution of particle sizes, **d)** XRD characterization of pristine Pt/C catalyst and SEM images of **e)** pristine Pt/C layer on CP substrate and **f)** pristine CP substrate.

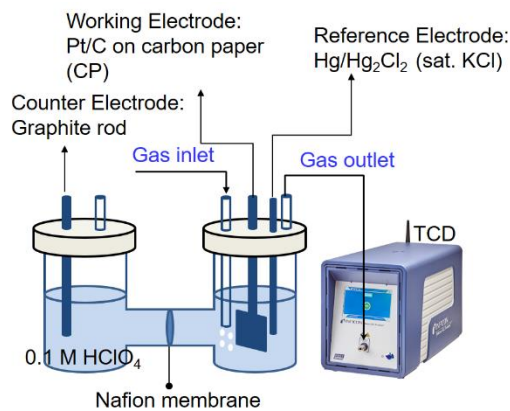

**Fig. S2.** Schematic representation of the two-compartment cell (H-cell) used for catalytic measurement.

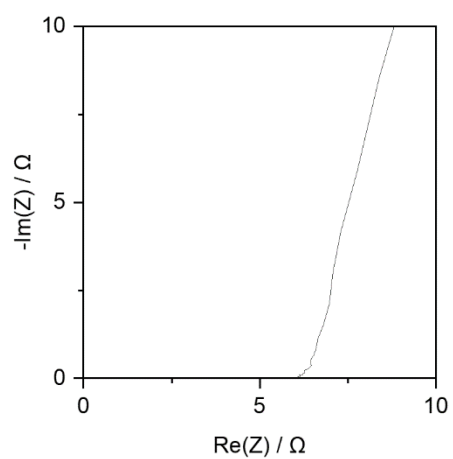

**Fig. S3.** PEIS profile for resistance determination. Conditions: WE: 3 mg Pt/C on  $2 \times 2 \text{ cm}^2$  CP; potential: 0.70 V vs. RHE; initial frequency: 200 kHz; final frequency: 100 mHz; gas flow rate:  $20 \text{ ml min}^{-1}$ ; pressure: 101 kPa;  $p(\text{CO})$ : 25 kPa;  $p(\text{O}_2)$ : 10 kPa; balance: Ar; RE: Hg/Hg<sub>2</sub>Cl<sub>2</sub> (sat. KCl); CE: graphite rod; 295 K; stirring rate: 750 rpm; 0.1 M HClO<sub>4</sub>.

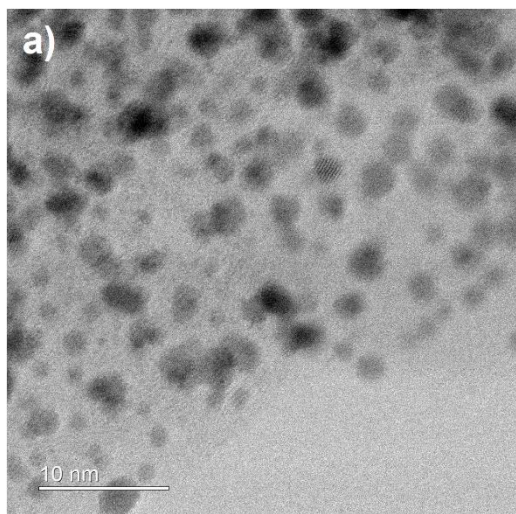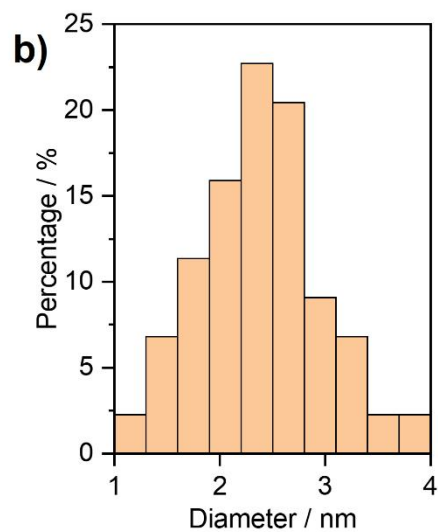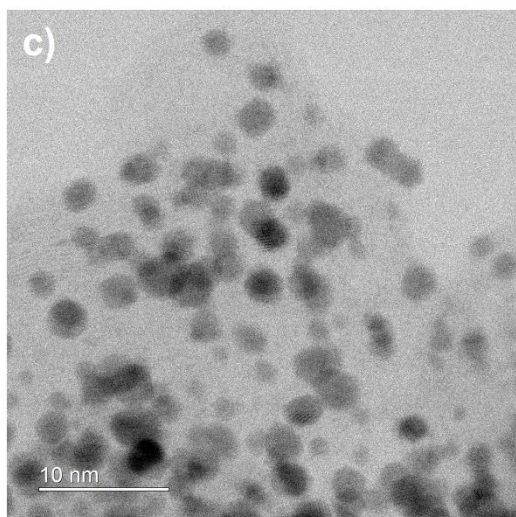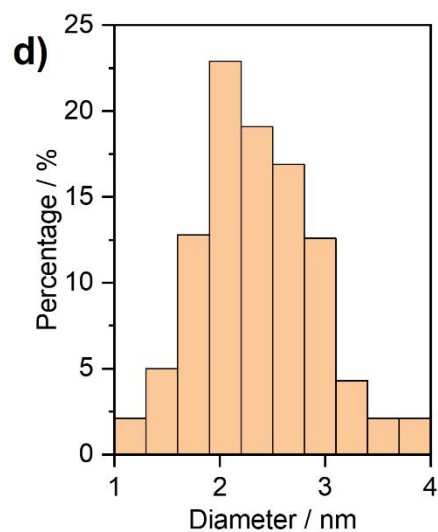

**Fig. S4.** **a)** TEM image and **b)** distribution of particle sizes of Pt/C catalyst after OCP-shift measurement. **c)** TEM image and **d)** distribution of particle sizes of Pt/C catalyst after 4-h reaction under 25 kPa CO and 10 kPa O<sub>2</sub> with 0.70 V vs. RHE applied.

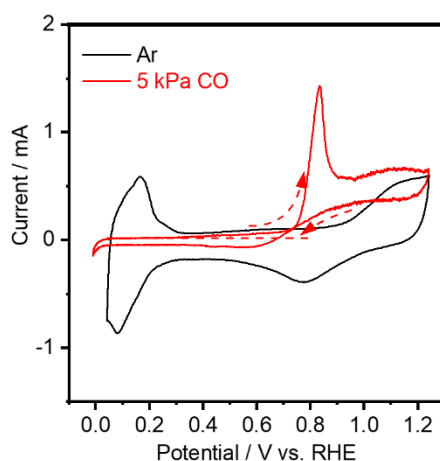

**Fig. S5.** Cyclic voltammetry (CV) characterization of Pt/C catalyst under pure Ar or diluted CO. Conditions: WE: 0.75 mg Pt/C on  $1 \times 1 \text{ cm}^2$  CP; gas flow rate:  $20 \text{ ml min}^{-1}$ ; pressure: 101 kPa; Scan rate:  $2 \text{ mV s}^{-1}$ ; RE: Hg/Hg<sub>2</sub>Cl<sub>2</sub> (sat. KCl); CE: graphite rod; 295 K; stirring rate: 750 rpm; 0.1 M HClO<sub>4</sub>.

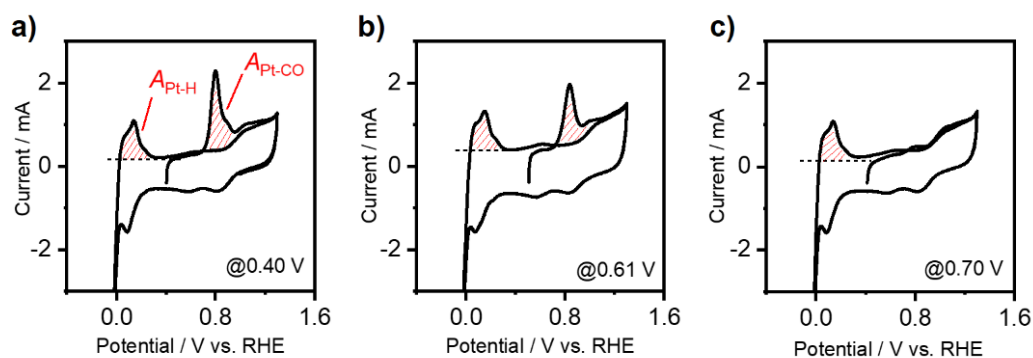

**Fig. S6.** CV profiles used for CO\* coverage ( $\theta_{\text{CO}}$ ) calculation at **a)** 0.40 V, **b)** 0.61 V, and **c)** 0.70 V vs. RHE. WE: 0.75 mg Pt/C on  $1 \times 1 \text{ cm}^2$  CP; gas flow rate:  $20 \text{ ml min}^{-1}$ ; pressure: 101 kPa; Scan rate:  $1 \text{ mV s}^{-1}$ ; RE: Hg/Hg<sub>2</sub>Cl<sub>2</sub> (sat. KCl); CE: graphite rod; 295 K; stirring rate: 750 rpm; 0.1 M HClO<sub>4</sub>.

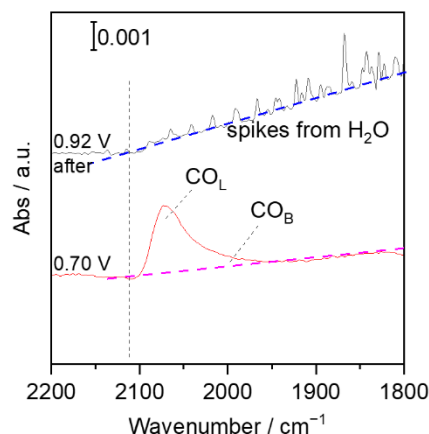

**Fig. S7.** Infrared spectra at 0.70 V (red) and 0.92 V (black) vs. RHE under 25 kPa CO and 10 kPa O<sub>2</sub>. The baseline for the integral of CO\* band was determined based on the baseline appearing in the case of 0.92 V.

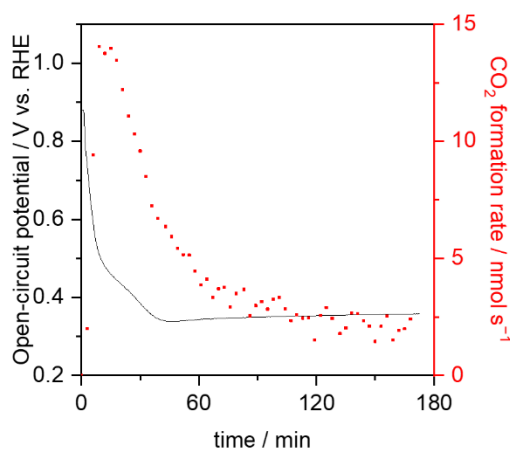

**Fig. S8.** Time evolution of open-circuit potential of Pt/C catalyst during CO oxidation and corresponding reaction rate. Conditions: WE: 3 mg Pt/C on 2×2 cm<sup>2</sup> CP; gas flow rate: 20 ml min<sup>-1</sup>; pressure: 101 kPa;  $p(\text{CO})$ : 25 kPa;  $p(\text{O}_2)$ : 10 kPa; RE: Hg/Hg<sub>2</sub>Cl<sub>2</sub> (sat. KCl); CE: graphite rod; stirring rate: 750 rpm; 295 K; 0.1 M HClO<sub>4</sub>.

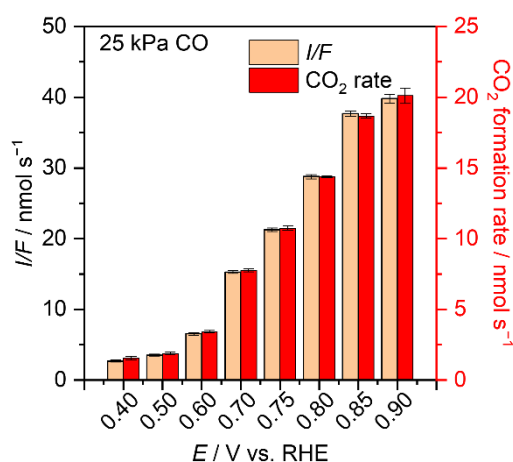

**Fig. S9.** Comparison of electric current and corresponding CO<sub>2</sub> formation rate in unit of nmol s<sup>-1</sup> at varied potentials, showing a ratio of ~2 and indicating a FE of ~100% for electrochemical CO oxidation under the given condition. Conditions: WE: 3 mg Pt/C on 2×2 cm<sup>2</sup> CP; gas flow rate: 20 ml min<sup>-1</sup>; pressure: 101 kPa; *p*(CO): 25 kPa; balance: Ar; RE: Hg/Hg<sub>2</sub>Cl<sub>2</sub> (sat. KCl); CE: graphite rod; 295 K; stirring rate: 750 rpm; 0.1 M HClO<sub>4</sub>.

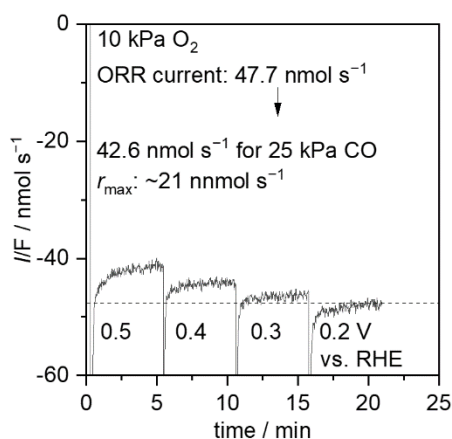

**Fig. S10.** Measurement of diffusion-limited ORR current for the estimation of diffusion-limited CO oxidation rate. Conditions: WE: 3 mg Pt/C on 2×2 cm<sup>2</sup> CP; gas flow rate: 20 ml min<sup>-1</sup>; pressure: 101 kPa; *p*(O<sub>2</sub>): 10 kPa; balance: Ar; RE: Hg/Hg<sub>2</sub>Cl<sub>2</sub> (sat. KCl); CE: graphite rod; 295 K; stirring rate: 750 rpm; 0.1 M HClO<sub>4</sub>.

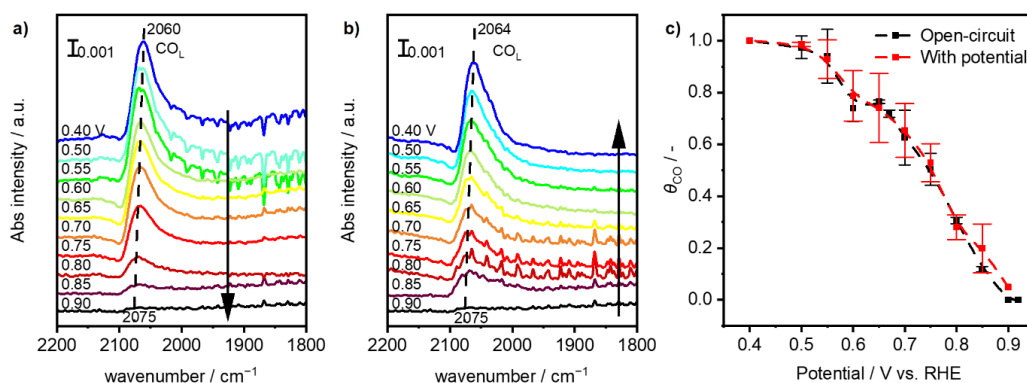

**Fig. S11.** The evolution of infrared spectra with external potential **a)** changing from 0.40 V to 0.90 V vs. RHE and **b)** changing from 0.90 V back to 0.40 V vs. RHE. **c)** Calculated  $\theta_{\text{CO}}$  as a function of external potential based on ATR-IRAS. Conditions: WE: Pt/C on IRE; gas flow rate: 20 ml min<sup>-1</sup>; pressure: 101 kPa; balance: Ar; RE: Hg/Hg<sub>2</sub>Cl<sub>2</sub> (sat. KCl); CE: Pt wire; 0.1 M HClO<sub>4</sub>; 295 K.

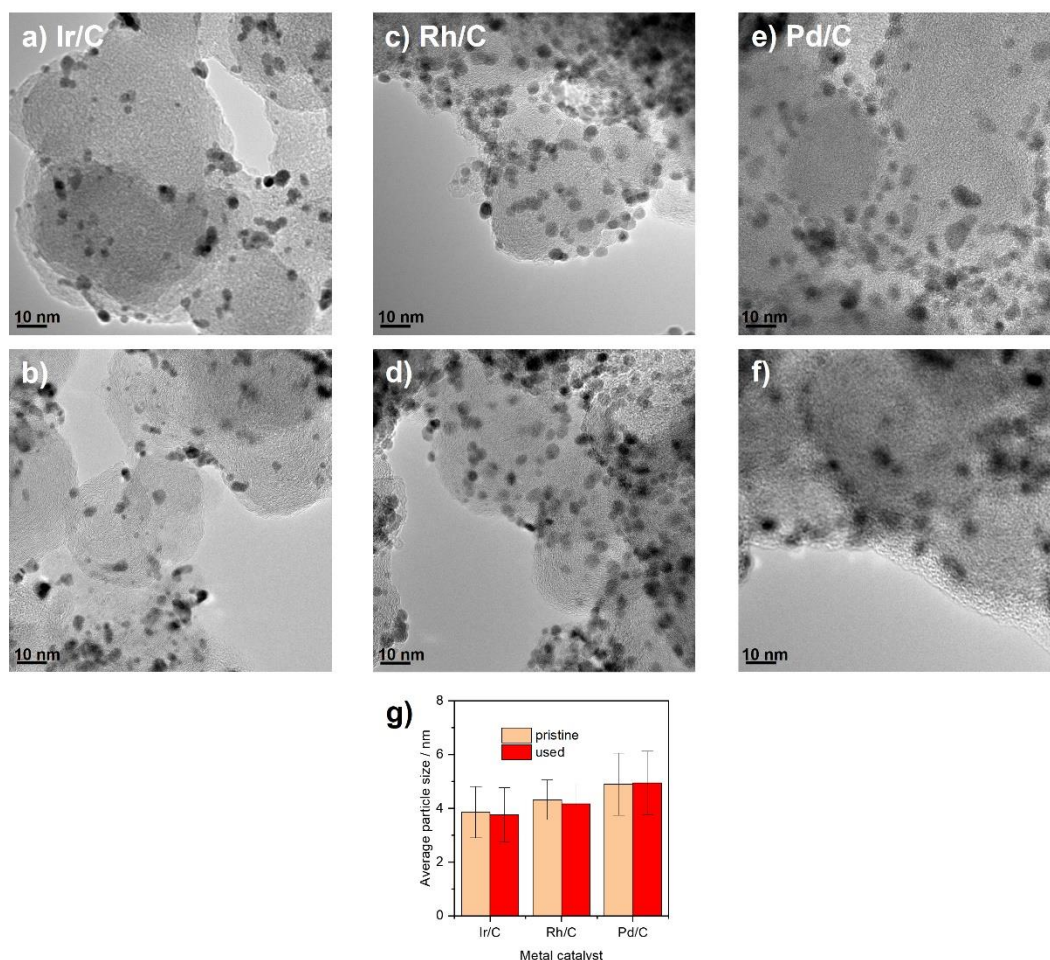

**Fig. S12.** TEM images of **a)** pristine Ir/C, **b)** used Ir/C, **c)** pristine Rh/C, **d)** used Rh/C, **e)** pristine Pd/C and **f)** used Pd/C, and **g)** statistical comparison of particle sizes of pristine and used catalysts. Reaction potential: 0.75 V vs. RHE for Ir/C, 0.70 V for Rh/C and 0.90 V for Pd/C (potentials for the best FE).

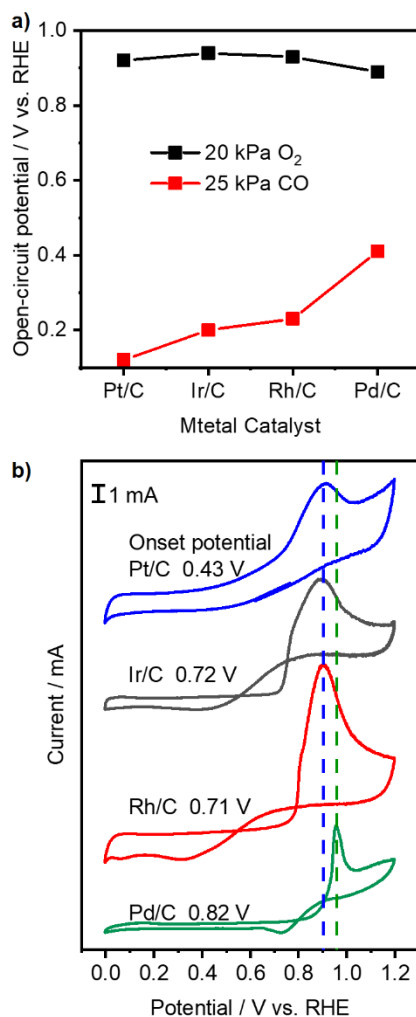

**Fig. S13. a)** OCP values of metal catalysts under 20 kPa O<sub>2</sub> or 25 kPa CO. **b)** CV profiles of metal catalysts under 25 kPa CO. Conditions: WE: 3 mg metal/C on 2×2 cm<sup>2</sup> CP; gas flow rate: 20 ml min<sup>-1</sup>; pressure: 101 kPa; balance: Ar; RE: Hg/Hg<sub>2</sub>Cl<sub>2</sub> (sat. KCl); CE: graphite rod; stirring rate: 750 rpm; scan rate: 2 mV s<sup>-1</sup>; 295 K; 0.1 M HClO<sub>4</sub>.

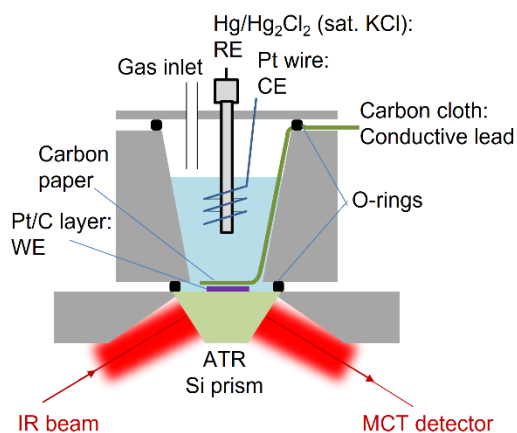

**Fig. S14.** Schematic presentation of the electrochemical cell for in situ attenuated total reflection-infrared absorption spectroscopy (ATR-IRAS) measurement.
